# Supplementary material for: Molecular fingerprinting of particulate organic matter as a new tool for its source apportionment: changes along a headwater drainage in coarse, medium and fine particles as a function of rainfalls
Source: Copernicus journal article supplement (doi:10.5194/bg-2017-325), 2017-09-05
Supplement: Supplementary file 1 [file bg-2017-325-supplement.pdf]

1 Table S1: List of the analyzed compounds and of the m/z ratio and mass spectra factor used for their integration.  
2 Table S2: Source apportionment calculated using molecular, isotopic and elemental data.  
3 Table S3: *p*-Values of the Student T-test comparing the source apportionment calculated using molecular data  
4 versus molecular, isotopic and elemental data. P-Values were higher than 0.05 then the differences were not  
5 significant.  
6 Figure S1: Linear regression between measured  $d^{13}C$  (Rowland et al., 2017) and modeled  $d^{13}C$  from the source  
7 apportionment performed using molecular data. The slope of the regression is 1.012 with a *p*-value < 0.0001 and  
8  $R^2$  is 0.59.  
9 Figure S2: Linear regression between the sum of the concentrations of target compounds ( $\mu\text{g/g}$  of dry sample)  
10 and total organic carbon TOC from Rowland et al. (2017) ( $\text{mg/g}$  of dry sample). The slope of the regression is  
11  $1.70 \text{ E-}03$  with a *p*-value < 0.0001 and  $R^2$  is 0.94.  
12

Table S1. List of the analyzed compounds and of the m/z ratio and mass spectra factor used for their integration.

| Compounds                                                      | m/z | Int | MSF  |
|----------------------------------------------------------------|-----|-----|------|
| <i>Deoxyaldonic acids methyl ester produced by the THM of:</i> |     |     |      |
| pentose (2 peaks)                                              | 129 |     | 4    |
| deoxyhexose (4 peaks)                                          | 129 |     | 4    |
| hexose (4 peaks)                                               | 129 |     | 4    |
| <i>Low organic acid methyl esters</i>                          |     |     |      |
| 2,4-Heptadienoic acid methyl ester                             | 111 |     | 3.9  |
| Succinic acid methyl ester                                     | 115 |     | 4.5  |
| Fumaric acid methyl ester                                      | 113 |     | 3.3  |
| Benzoic acid methyl ester                                      | 105 |     | 2.9  |
| <i>Fatty acid methyl esters</i>                                |     |     |      |
| C <sub>6:0</sub>                                               | 74  |     | 3.1  |
| C <sub>7:0</sub>                                               | 74  |     | 3.1  |
| C <sub>8:0</sub>                                               | 74  |     | 3.0  |
| C <sub>9:0</sub>                                               | 74  |     | 3.6  |
| C <sub>10:0</sub>                                              | 74  |     | 3.0  |
| <i>a,w</i> C <sub>8:0</sub>                                    | 74  |     | 14.9 |
| C <sub>12:0</sub>                                              | 74  |     | 3.0  |
| <i>a,w</i> C <sub>9:0</sub>                                    | 74  |     | 10.2 |
| <i>i</i> C <sub>13:0</sub>                                     | 74  |     | 4.1  |
| <i>a</i> C <sub>13:0</sub>                                     | 74  |     | 4.1  |
| C <sub>13:0</sub>                                              | 74  |     | 4.1  |
| <i>br</i> C <sub>14:0</sub>                                    | 74  |     | 3.1  |
| C <sub>14:1</sub>                                              | 74  |     | 14.5 |
| C <sub>14:0</sub>                                              | 74  |     | 3.1  |
| <i>i</i> C <sub>15:0</sub>                                     | 74  |     | 3.3  |
| <i>a</i> C <sub>15:0</sub>                                     | 74  |     | 3.3  |
| C <sub>15:0</sub>                                              | 74  |     | 3.3  |
| <i>br</i> C <sub>16:0</sub>                                    | 74  |     | 4.9  |
| C <sub>16:1</sub>                                              | 74  |     | 14.5 |
| C <sub>16:0</sub>                                              | 74  |     | 4.9  |
| <i>i</i> C <sub>17:0</sub>                                     | 74  |     | 3.9  |
| <i>a</i> C <sub>17:0</sub>                                     | 74  |     | 3.9  |
| C <sub>17:1</sub>                                              | 74  |     | 14.5 |
| C <sub>17:0</sub>                                              | 74  |     | 3.9  |
| C <sub>18:1</sub>                                              | 74  |     | 14.6 |
| C <sub>18:0</sub>                                              | 74  |     | 4.5  |
| <i>wOHC</i> <sub>16:0</sub>                                    | 74  |     | 12.1 |
| C <sub>19:1</sub>                                              | 74  |     | 14.5 |
| C <sub>19:0</sub>                                              | 74  |     | 4.3  |
| <i>a,w</i> C <sub>16:0</sub>                                   | 74  |     | 11.3 |
| C <sub>20:0</sub>                                              | 74  |     | 4.9  |
| <i>wOHC</i> <sub>18:0</sub>                                    | 74  |     | 17.3 |
| C <sub>21:0</sub>                                              | 74  |     | 7.5  |

Table S1. continued.

| Compounds                              | m/z Int | MSF  |
|----------------------------------------|---------|------|
| <i>Fatty acid methyl esters</i>        |         |      |
| <i>a,wC</i> <sub>18:0</sub>            | 74      | 17.7 |
| <i>C</i> <sub>22:0</sub>               | 74      | 4.9  |
| <i>wOHC</i> <sub>20:0</sub>            | 74      | 12.9 |
| <i>C</i> <sub>23:0</sub>               | 74      | 8.4  |
| <i>a,wC</i> <sub>20:0</sub>            | 74      | 10.8 |
| <i>C</i> <sub>24:0</sub>               | 74      | 4.4  |
| <i>wOHC</i> <sub>22:0</sub>            | 74      | 13.5 |
| <i>C</i> <sub>25:0</sub>               | 74      | 7.7  |
| <i>a,wC</i> <sub>22:0</sub>            | 74      | 10.8 |
| <i>C</i> <sub>26:0</sub>               | 74      | 4.5  |
| <i>wOHC</i> <sub>24:0</sub>            | 74      | 13.5 |
| <i>C</i> <sub>27:0</sub>               | 74      | 5.1  |
| <i>a,wC</i> <sub>24:0</sub>            | 74      | 9.7  |
| <i>C</i> <sub>28:0</sub>               | 74      | 4.9  |
| <i>wOHC</i> <sub>26:0</sub>            | 74      | 14.4 |
| <i>C</i> <sub>29:0</sub>               | 74      | 4.9  |
| <i>a,wC</i> <sub>26:0</sub>            | 74      | 9.7  |
| <i>C</i> <sub>30:0</sub>               | 74      | 4.9  |
| <i>wOHC</i> <sub>28:0</sub>            | 74      | 14.4 |
| <i>C</i> <sub>31:0</sub>               | 74      | 4.9  |
| <i>a,wC</i> <sub>28:0</sub>            | 74      | 9.7  |
| <i>C</i> <sub>32:0</sub>               | 74      | 4.9  |
| 10,16-diOHC <sub>16:0</sub>            | 71      | 7.4  |
| 9,10,18-triOHC <sub>18:0</sub>         | 71      | 8.6  |
| <i>Phenols</i>                         |         |      |
| 1,4-Dimethoxybenzene                   | 138     | 6.0  |
| Dimethoxytoluene                       | 152     | 5.7  |
| Dimethoxytoluene                       | 152     | 5.7  |
| 3-Methoxybenzoic acid methyl ester     | 135     | 3.9  |
| 4-Methoxybenzoic acid methyl ester     | 135     | 2.8  |
| 3-Methoxybenzaldehyde                  | 136     | 4.3  |
| 4-Methoxybenzaldehyde                  | 136     | 3.8  |
| 1,2,3-Trimethoxybenzene                | 168     | 3.8  |
| 1,2,4-Trimethoxybenzene                | 168     | 4.3  |
| 1,3,5-Trimethoxybenzene                | 168     | 3.0  |
| Trimethoxytoluene (3 peaks)            | 167     | 7.0  |
| dimethoxystyrene                       | 164     | 3.9  |
| 1,2,3,4-Tetramethoxybenzene            | 198     | 3.5  |
| 1,2,3,5-Tetramethoxybenzene            | 198     | 13.5 |
| 3,4-Dimethoxybenzaldehyde              | 166     | 4.2  |
| 3,4-Dimethoxyacetophenone              | 165     | 2.8  |
| 2,3-Dimethoxybenzoic acid methyl ester | 196     | 7.6  |
| 3,5-Dimethoxybenzoic acid methyl ester | 196     | 5.1  |

Table S1. continued.

| Compounds                                                          | m/z Int | MSF |
|--------------------------------------------------------------------|---------|-----|
| <i>Phenols</i>                                                     |         |     |
| 3,4-Dimethoxybenzoic acid methyl ester                             | 196     | 5.6 |
| 3,4,5-Trimethoxybenzaldehyde                                       | 196     | 6.7 |
| 3-(4-methoxyphenyl)prop-2-enoic acid methyl ester                  | 192     | 6.7 |
| 3,4,5-Trimethoxyacetophenone                                       | 195     | 4.8 |
| 1,2-Dimethoxy-4-(1-methoxyethenyl)benzene                          | 194     | 7.4 |
| <i>cis</i> -1,2-Dimethoxy-4-(2-methoxyethenyl)benzene              | 194     | 5.1 |
| <i>trans</i> -1,2-Dimethoxy-4-(2-methoxyethenyl)benzene            | 194     | 5.1 |
| <i>cis</i> -1,2-Dimethoxy-4-(3-methoxy-1-propenyl)benzene          | 208     | 5.6 |
| 2,4,5-Trimethoxypropenylbenzene                                    | 208     | 4.4 |
| 1,2-Dimethoxy-4-(1-methoxy-1-propenyl)benzene                      | 208     | 6.2 |
| <i>cis</i> -1,2-Dimethoxy-4-(2-methoxy-1-propenyl)benzene          | 208     | 5.7 |
| <i>trans</i> -1,2-Dimethoxy-4-(2-methoxy-1-propenyl)benzene        | 208     | 5.7 |
| <i>trans</i> -1,2-Dimethoxy-4-(3-methoxy-1-propenyl)benzene        | 208     | 5.6 |
| 3,4,5-Trimethoxybenzoic acid emthyl ester                          | 226     | 5.3 |
| <i>cis</i> -1,2,3-Trimethoxy-5-(2-methoxyethenyl)benzene           | 224     | 7   |
| <i>trans</i> -1,2,3-Trimethoxy-5-(2-methoxyethenyl)benzene         | 224     | 7   |
| <i>erythro</i> -1,2-Dimethoxy-4-(1,2,3-trimethoxypropyl)benzene    | 181     | 3.6 |
| <i>threo</i> -1,2-Dimethoxy-4-(1,2,3-trimethoxypropyl)benzene      | 181     | 3.6 |
| 3-(3,4-dimethoxyphenyl)prop-2-enoic acid methyl ester              | 222     | 3.7 |
| <i>cis</i> -1,2,3-Trimethoxy-5-(2-methoxy-1-propenyl)benzene       | 238     | 7   |
| <i>trans</i> -1,2,3-Trimethoxy-5-(2-methoxy-1-propenyl)benzene     | 238     | 7   |
| <i>cis</i> -1,2-Dimethoxy-4-(2,3-dimethoxy-1-propenyl)benzene      | 238     | 8.5 |
| <i>trans</i> -1,2-Dimethoxy-4-(2,3-dimethoxy-1-propenyl)benzene    | 238     | 8.5 |
| <i>erythro</i> -1,2,3-Trimethoxy-5-(1,2,3-trimethoxypropyl)benzene | 211     | 2.1 |
| <i>threo</i> -1,2,3-Trimethoxy-5-(1,2,3-trimethoxypropyl)benzene   | 211     | 2.1 |

13

14

Table S2. Source apportionment calculated using molecular, isotopic and elemental data.

|                                         |     | <i>12 ha location</i> |          |          | <i>79 ha location</i>  |          |          |
|-----------------------------------------|-----|-----------------------|----------|----------|------------------------|----------|----------|
|                                         |     | Li (%)                | Sbed (%) | FH-W (%) | Li (%)                 | Sbed (%) | FH-W (%) |
| <b>Event 1</b><br><i>May 1, 2014</i>    | C   | 97 ± 4                | 0 ± 1    | 2 ± 4    | 43 ± 8                 | 57 ± 8   | 0 ± 0    |
|                                         | M   | 75 ± 6                | 20 ± 4   | 4 ± 7    | 0 ± 0                  | 98 ± 3   | 2 ± 3    |
|                                         | F   | 70 ± 10               | 16 ± 4   | 14 ± 12  | 43 ± 8                 | 57 ± 8   | 0 ± 1    |
|                                         | POM | 92 ± 7                | 4 ± 3    | 4 ± 8    | 40 ± 5                 | 60 ± 6   | 0 ± 1    |
| <b>Event 2</b><br><i>Apr. 21, 2015</i>  | C   | 97 ± 5                | 1 ± 2    | 2 ± 5    | 96 ± 5                 | 1 ± 3    | 3 ± 5    |
|                                         | M   | 95 ± 6                | 1 ± 2    | 4 ± 7    | 52 ± 7                 | 46 ± 6   | 2 ± 4    |
|                                         | F   | 64 ± 11               | 17 ± 5   | 19 ± 14  | 45 ± 8                 | 52 ± 7   | 3 ± 5    |
|                                         | POM | 85 ± 7                | 7 ± 3    | 9 ± 8    | 89 ± 7                 | 8 ± 5    | 3 ± 5    |
| <b>Event 3</b><br><i>July 3, 2015</i>   | C   | 97 ± 4                | 2 ± 3    | 1 ± 2    | 45 ± 8                 | 55 ± 8   | 0 ± 0    |
|                                         | M   | 86 ± 4                | 12 ± 4   | 3 ± 5    | 39 ± 9                 | 61 ± 9   | 0 ± 0    |
|                                         | F   | 58 ± 6                | 41 ± 6   | 1 ± 3    | 39 ± 9                 | 53 ± 7   | 8 ± 7    |
|                                         | POM | 80 ± 5                | 18 ± 4   | 2 ± 3    | 42 ± 8                 | 55 ± 8   | 3 ± 2    |
| <b>Event 4</b><br><i>Sept. 30, 2015</i> | C   | 66 ± 14               | 0 ± 0    | 34 ± 14  | fraction not available |          |          |
|                                         | M   | 63 ± 13               | 0 ± 0    | 37 ± 13  | 36 ± 8                 | 0 ± 0    | 64 ± 8   |
|                                         | F   | 54 ± 10               | 1 ± 1    | 46 ± 10  | 68 ± 13                | 2 ± 3    | 29 ± 15  |
|                                         | POM | 57 ± 12               | 0 ± 0    | 43 ± 12  | -                      | -        | -        |

15

16

Table S3. *p*-Values of the Student T-test comparing the source apportionment calculated using molecular data versus molecular, isotopic and elemental data. P-Values were higher than 0.05 then the differences were not significant.

|                                         |   | <i>12 ha location</i> |           |          | <i>79 ha location</i>  |           |           |
|-----------------------------------------|---|-----------------------|-----------|----------|------------------------|-----------|-----------|
|                                         |   | Li (%)                | Sbed (%)  | FH-W (%) | Li (%)                 | Sbed (%)  | FH-W (%)  |
| <b>Event 1</b><br><i>May 1, 2014</i>    | C | 0.37                  | 0.25      | 0.45     | 0.27                   | 0.27      | <i>nc</i> |
|                                         | M | 0.24                  | 0.16      | 0.46     | 0.10                   | 0.13      | 0.15      |
|                                         | F | 0.14                  | 0.11      | 0.34     | 0.10                   | 0.11      | 0.17      |
| <b>Event 2</b><br><i>Apr. 21, 2015</i>  | C | 0.33                  | 0.29      | 0.42     | 0.39                   | 0.33      | 0.47      |
|                                         | M | 0.44                  | 0.31      | 0.49     | 0.10                   | 0.18      | 0.09      |
|                                         | F | 0.24                  | 0.22      | 0.39     | 0.08                   | 0.15      | 0.12      |
| <b>Event 3</b><br><i>July 3, 2015</i>   | C | 0.27                  | 0.37      | 0.33     | 0.23                   | 0.23      | <i>nc</i> |
|                                         | M | 0.24                  | 0.18      | 0.46     | 0.18                   | 0.18      | <i>nc</i> |
|                                         | F | 0.17                  | 0.23      | 0.18     | 0.12                   | 0.31      | 0.10      |
| <b>Event 4</b><br><i>Sept. 30, 2015</i> | C | 0.20                  | 0.19      | 0.17     | fraction not available |           |           |
|                                         | M | 0.19                  | <i>nc</i> | 0.19     | 0.47                   | <i>nc</i> | 0.47      |
|                                         | F | 0.16                  | <i>nc</i> | 0.20     | 0.15                   | 0.30      | 0.19      |

*nc.* The calculation was not possible because the contributions were nul.

17

18

19 **Figure S1**

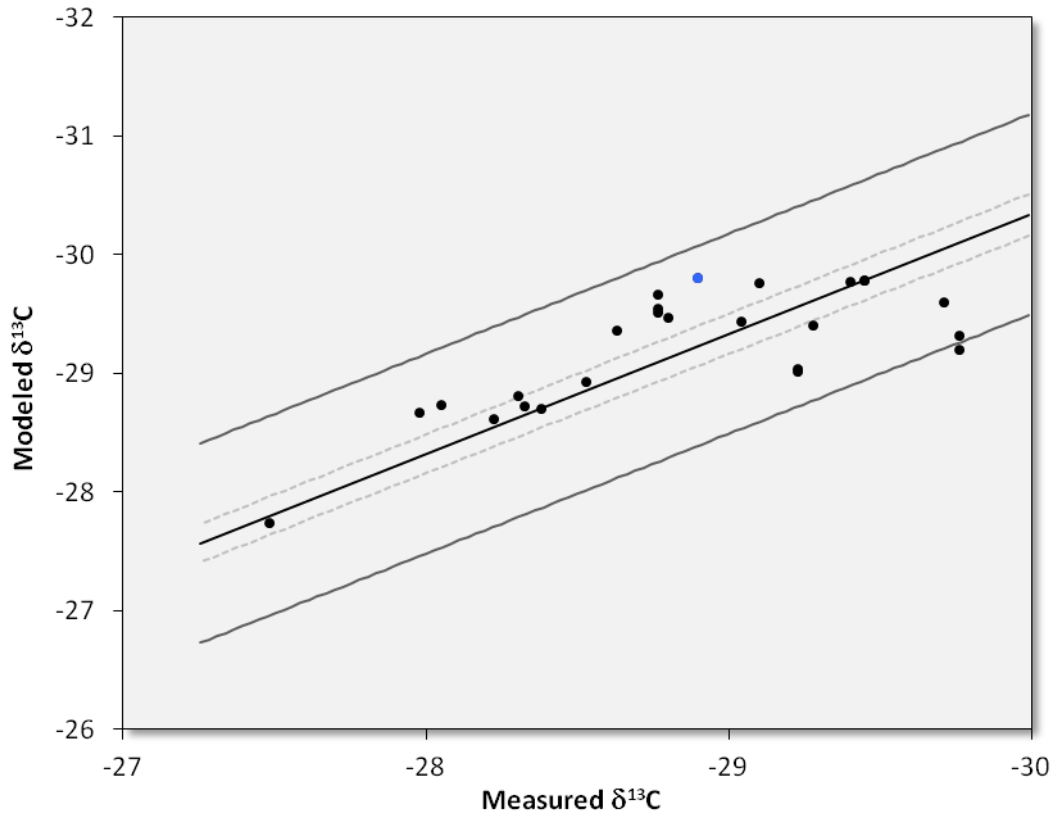

20

21

22 **Figure S2**

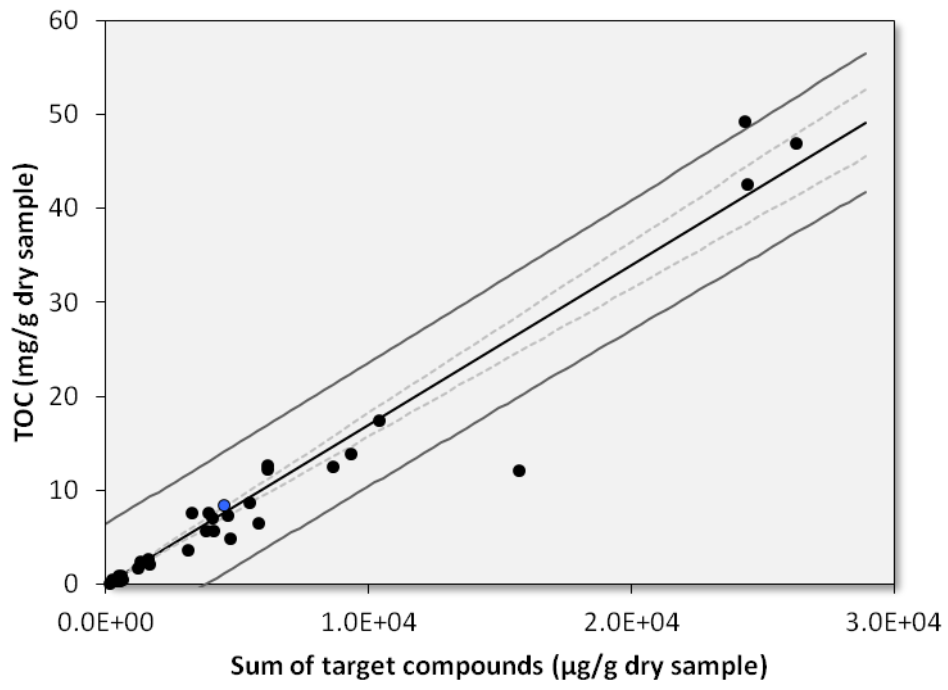

23

24
